# Supplementary material for: Electrospun fibrous mats as a skeleton for fabricating hierarchically structured materials as sorbents for Cu2+
Source: Royal Society of Chemistry journal article supplement (doi:10.1039/c2jm13874c), 2012-01-01
Supplement: c2jm13874c.pdf [file c2jm13874c.pdf]

## Supporting Information

### Electrospun Fibrous Mats as Skeleton for Fabricating Hierarchically Structured Materials as Sorbents for $\text{Cu}^{2+}$

By Yi-nan Wu, Bingru Zhang, Fengting Li\*, Wei Zhu, Phillip Hannam and Guangtao Li\*

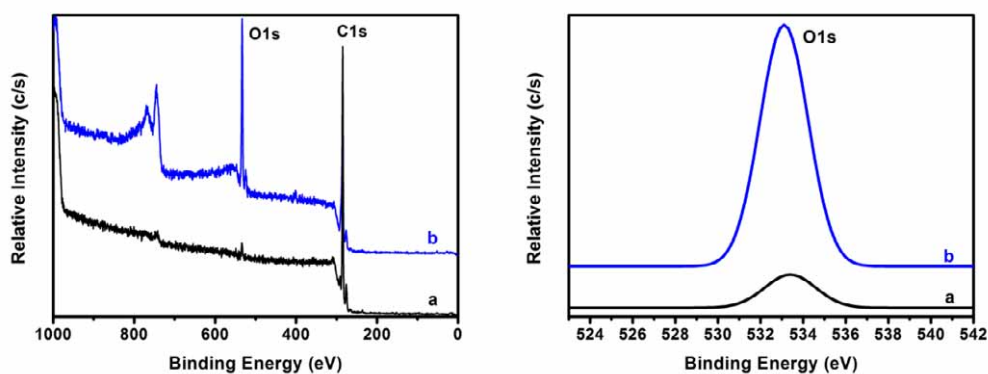

**Fig S1.** X-ray photoelectron spectroscopy of (a) pre-air-plasma and (b) post-air-plasma treated electrospun PS membranes.

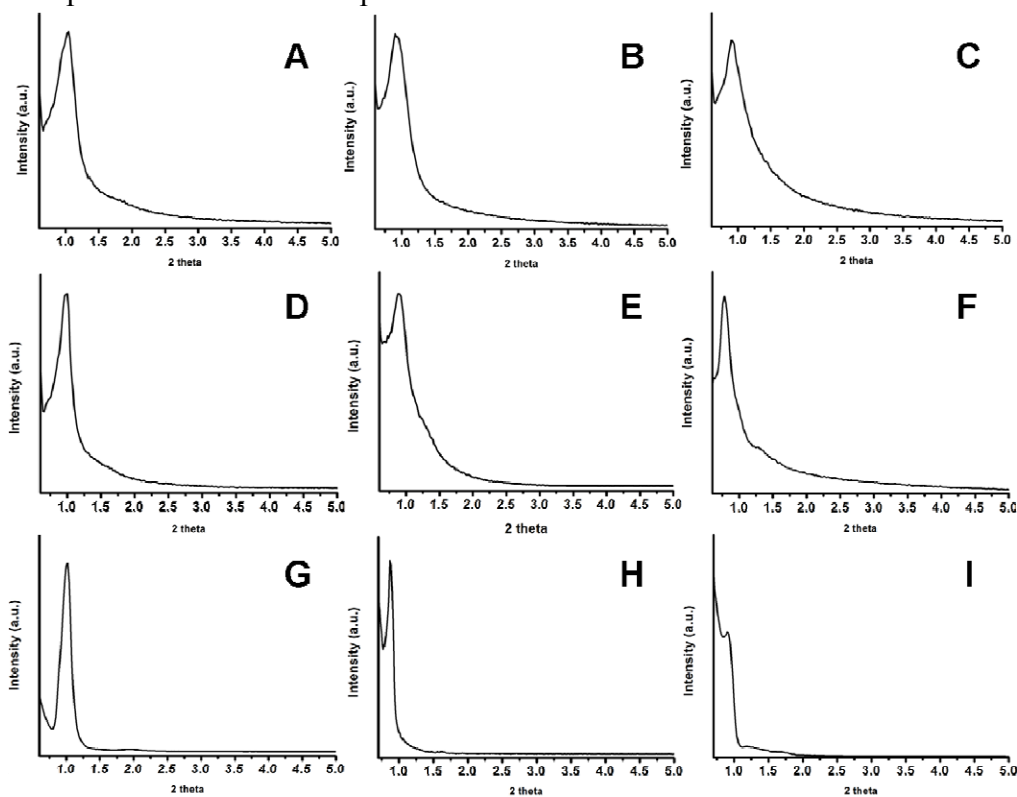

**Fig S2.** XRD patterns of the powders from the precursor sols for the preparation of thiol-functionalized mesoporous silica/PS membranes (sample A-I).

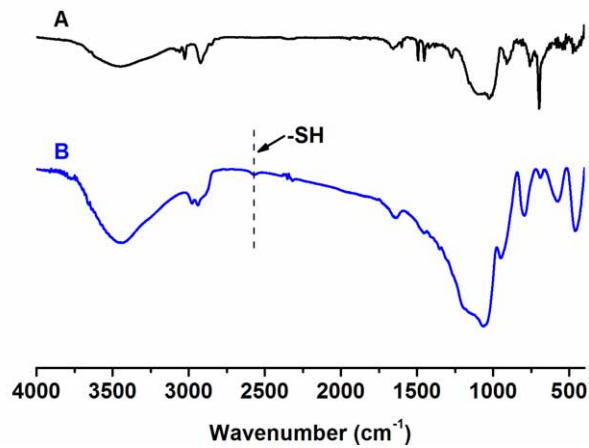

**Fig S3.** FT-IR results of A) the silica/electrospun PS membranes and B) the silica coating layer.

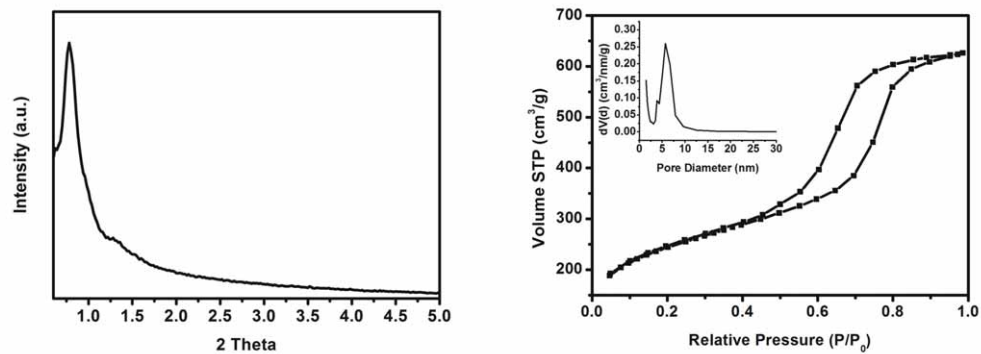

**Fig S4.** XRD pattern (left) and N<sub>2</sub> adsorption-desorption isotherm (right) of powders from the precursor for the preparation of non-functionalized membrane.
